# Supplementary material for: Functional PEG building blocks via copolymerization of ethylene carbonate and tert-butyl glycidyl ether
Source: Royal Society of Chemistry journal article supplement (doi:10.1039/c6py00768f), 2016-01-01
Supplement: c6py00768f1.pdf [file c6py00768f1.pdf]

Supporting Information

## Functional PEG building blocks via copolymerization of ethylene carbonate and tert.butyl glycidyl ether

Gent Kapiti, Helmut Keul\*, Martin Möller\*

Institute of Technical and Macromolecular Chemistry, RWTH Aachen University and  
DWI–Leibniz-Institute for Interactive Materials, Forckenbeckstr. 50, D-52056 Aachen,  
Germany. E-mail: [Keul@dwI.rwth-aachen.de](mailto:Keul@dwI.rwth-aachen.de) , [Moeller@dwI.rwth-aachen.de](mailto:Moeller@dwI.rwth-aachen.de)

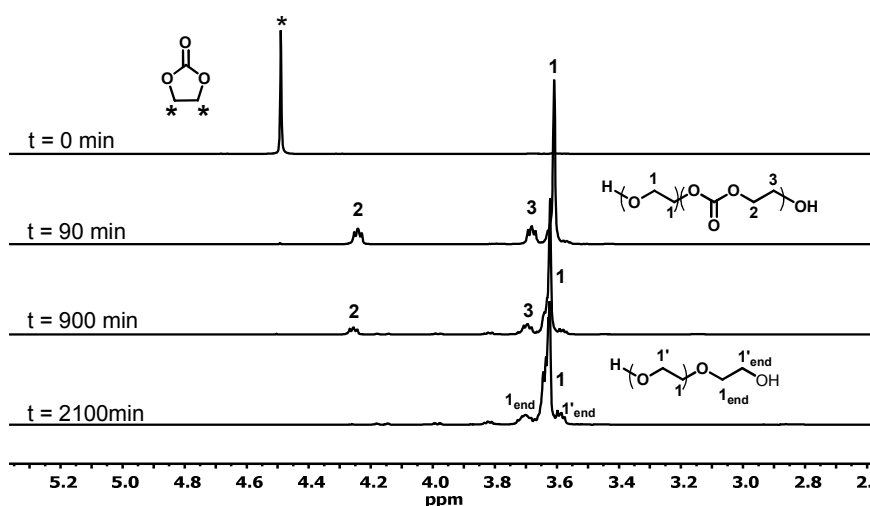

Figure S1 <sup>1</sup>H-NMR analysis of PO c at t = 0 min, t = 90 min, t = 900 min and t = 2100 min.

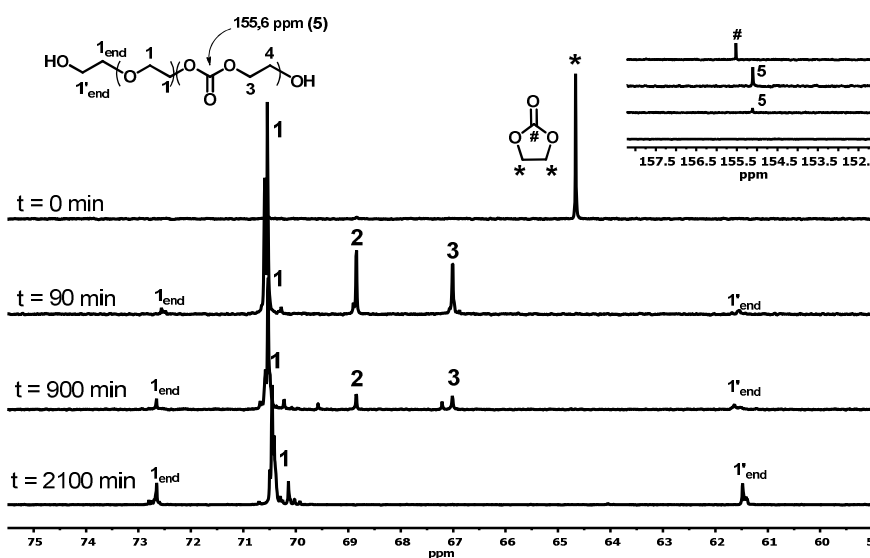

Figure S2 <sup>13</sup>C-NMR analysis of PO c at t = 0 min, t = 90 min, t = 900 min and t = 1200 min.

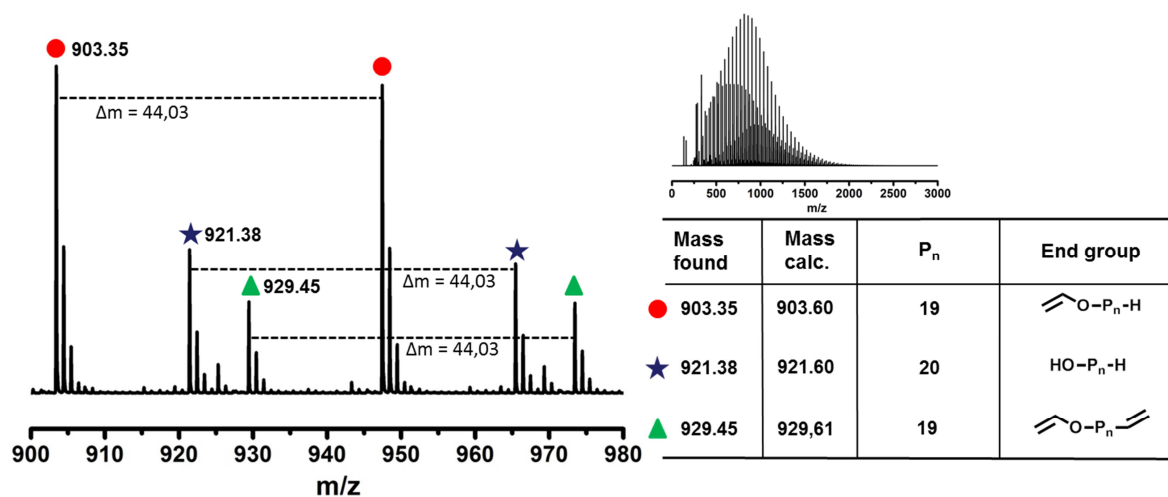

**Table S1** Detailed MALDI-ToF analysis of **PO c** including the found and the calculated masses. [EC]/[CsOH] = 100, T = 180°C, t = 35h (2100 min). P<sub>n</sub> = (EO)<sub>n</sub>, (CH<sub>2</sub>-CH<sub>2</sub>-O)<sub>n</sub>.

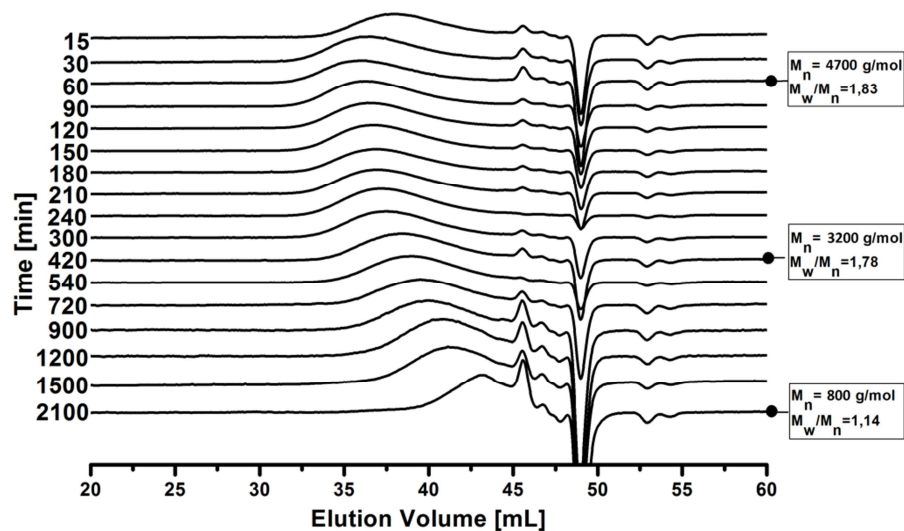

**Figure S3** Time resolved SEC analysis of **EC** polymerisation with CsOH as initiator (**PO c**). [EC]/[CsOH] = 100, T = 180°C, t = 35h (2100 min).

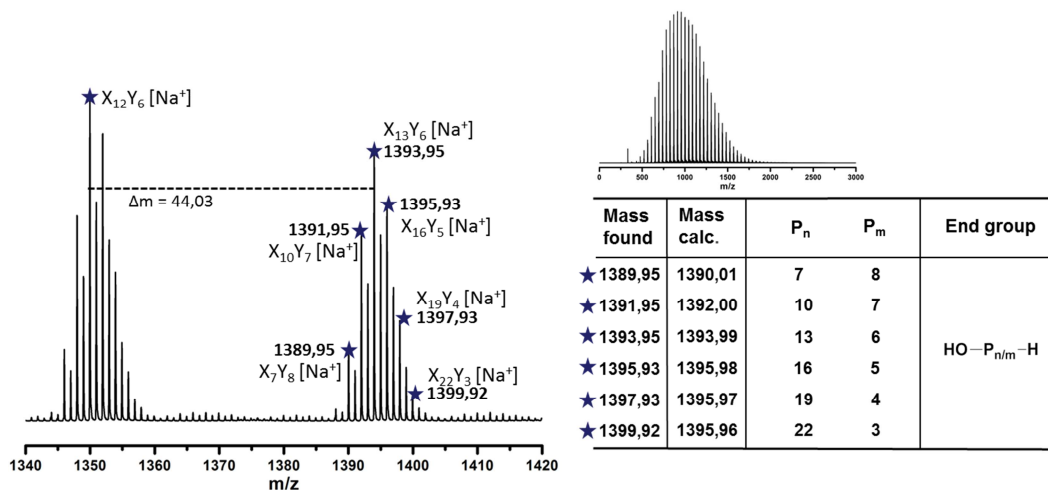

**Table S2** Detailed MALDI-ToF analysis of **P1** including the found and the calculated masses. [M]/[CsOH] = 150, [EC]/[TBGE] = 100/50, T = 180°C, t = 15h. P<sub>n</sub> = {EO}<sub>n</sub> = X; P<sub>m</sub> = {TBGE}<sub>m</sub> = Y

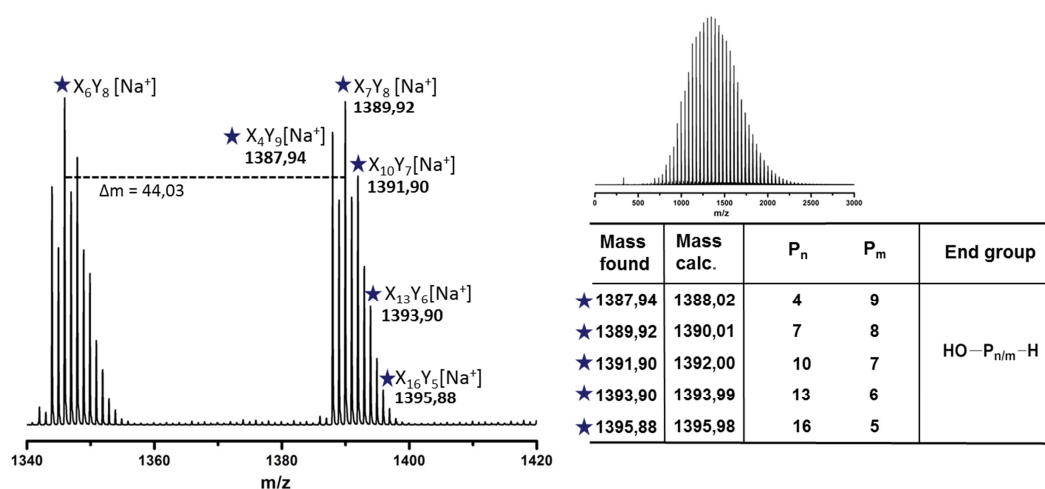

**Table S3** Detailed MALDI-ToF analysis of **P2** including the found and the calculated masses. [M]/[CsOH] = 150, [EC]/[TBGE] = 75/75, T = 180°C, t = 15h. P<sub>n</sub> = {EO}<sub>n</sub> = X; P<sub>m</sub> = {TBGE}<sub>m</sub> = Y

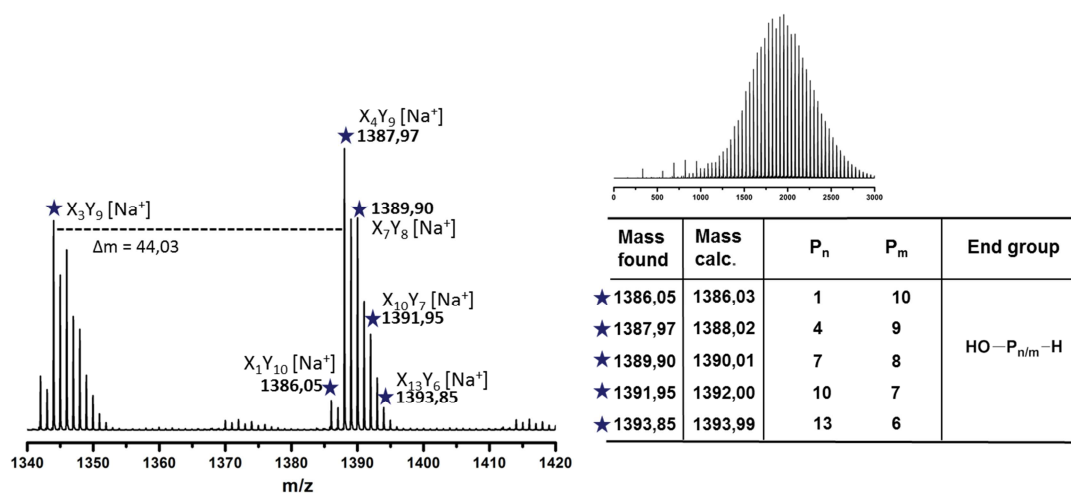

**Table S4** Detailed MALDI-ToF analysis of **P3** including the found and the calculated masses. [M]/[CsOH] = 150, [EC]/[TBGE] = 50/100, T = 180°C, t = 15h. P<sub>n</sub> = {EO}<sub>n</sub> = X; P<sub>m</sub> = {TBGE}<sub>m</sub> = Y

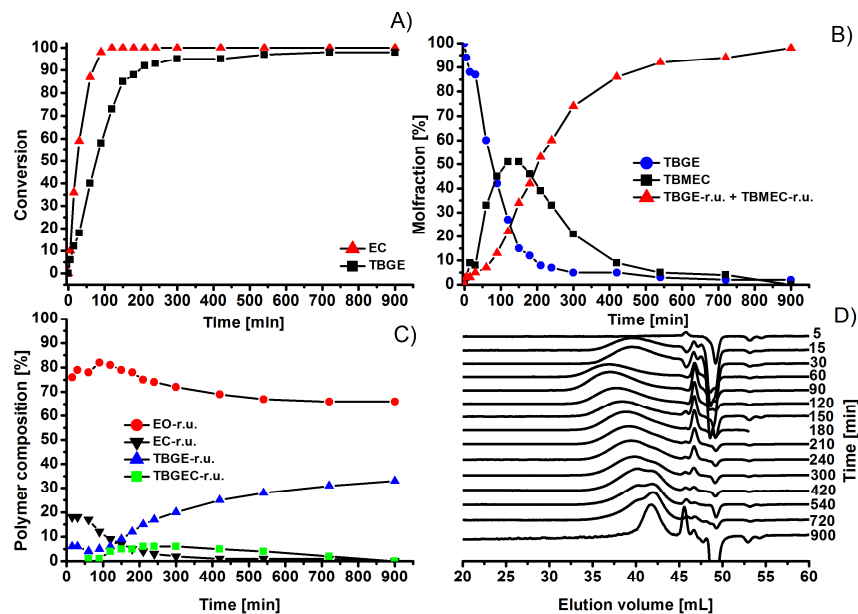

**Figure S4** Kinetic investigation of for the synthesis of **P1** ( $[M]/[CsOH] = 150$ ,  $[EC]/[TBGE] = 100/50$ ,  $T = 180^{\circ}C$ ,  $t = 15h$ ). A): Conversion versus time plot. B): Molfraction of TBGE, TBMEC, and TBGE-r.u. + TBMEC-r.u. versus time. C): Polymer composition versus time plot. D): Time depended GPC analysis of the copolymerisation.

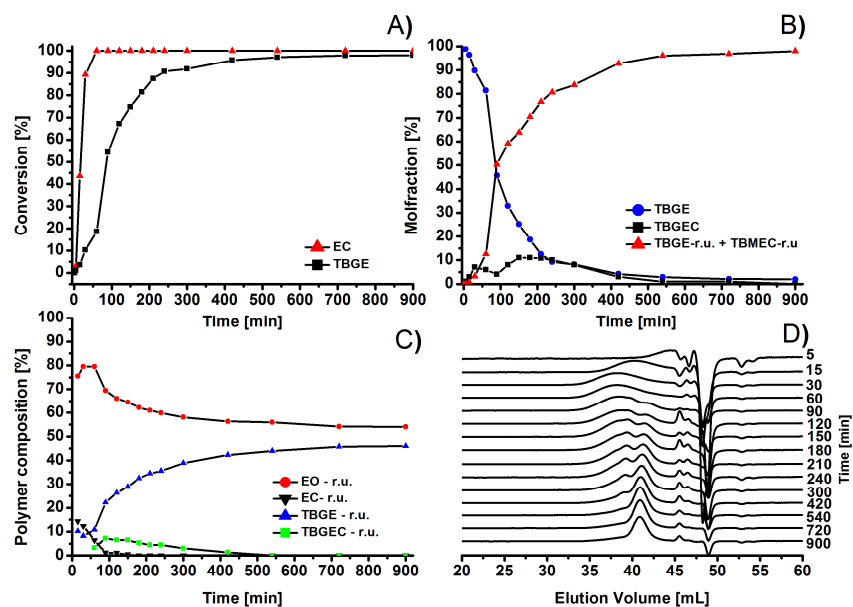

**Figure S5** Kinetic investigation of for the synthesis of **P2** ( $[M]/[CsOH] = 150$ ,  $[EC]/[TBGE] = 75/75$ ,  $T = 180^{\circ}C$ ,  $t = 15h$ ). A): Conversion versus time plot. B): Molfraction of TBGE, TBMEC, and TBGE-r.u. + TBMEC-r.u. versus time. C): Polymer composition versus time plot. D): Time depended GPC analysis of the copolymerisation.

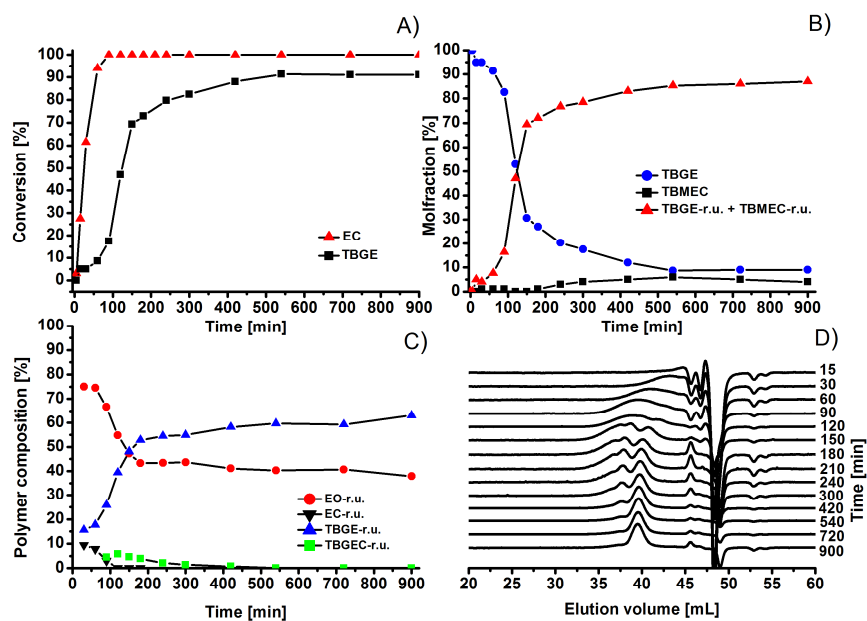

**Figure S6** Kinetic investigation of for the synthesis of **P3** ( $[M]/[CsOH] = 150$ ,  $[EC]/[TBGE] = 50/100$ ,  $T = 180^{\circ}C$ ,  $t = 15h$ ). A): Conversion versus time plot. B): Molfraction of TBGE, TBMEC, and TBGE-r.u. + TBMEC-r.u. versus time. C): Polymer composition versus time plot. D): Time depended GPC analysis of the copolymerisation.

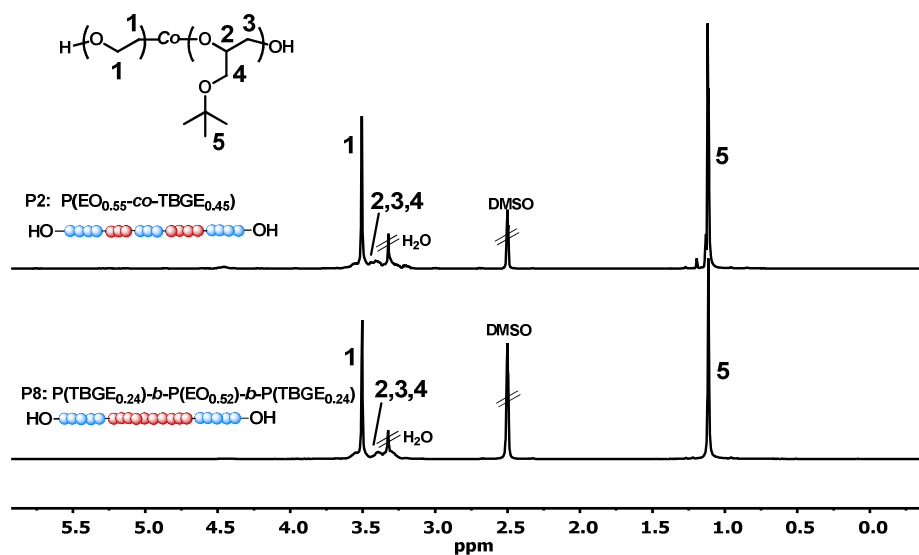

**Figure S7** Comparison of  $^1H$ -NMR spectra of **P2** (multi block) and **P8** (triblock).

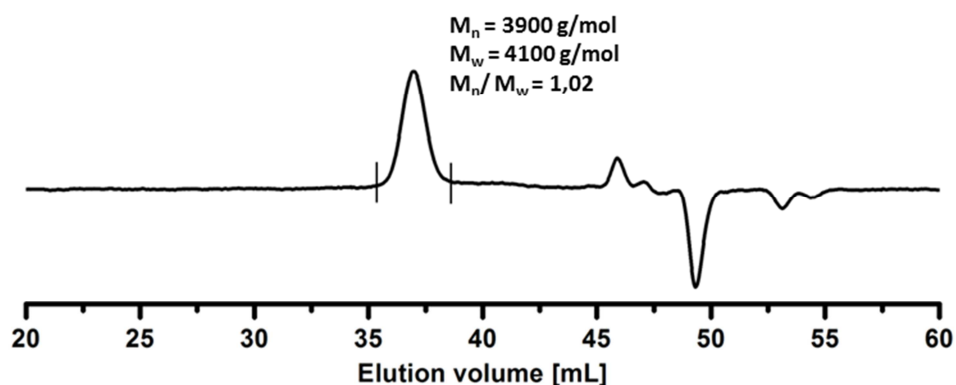

**Figure S8** SEC elugram of **P8** (triblock) in DMF.

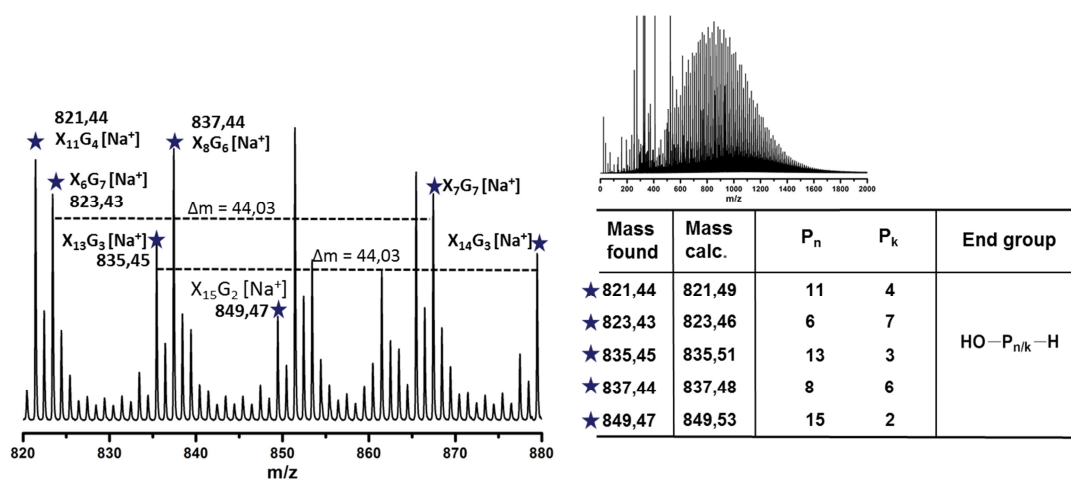

**Table S5** Detailed MALDI-ToF analysis of **P9** including the found and the calculated masses.

$P_n = \{EO\}_n = X$ ;  $P_k = \{TBGE\}_k = G$

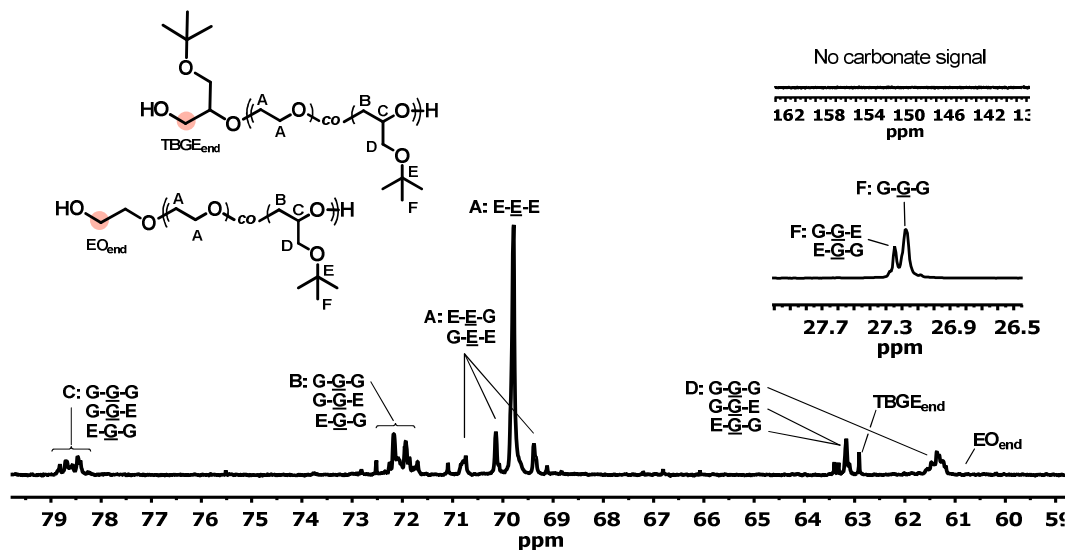

**Figure S9** Detailed <sup>13</sup>C-NMR (100 MHz, d<sub>6</sub>-DMSO) analysis of **P4** including end group assignment.

#### Removal of the brownish colour from raw polymer products (representative example)

**P4** (1 g) was placed in a round bottom flask and dissolved in isopropyl alcohol (10 mL). Activated carbon (200 mg) was added to the solution and stirred for 2 h. The mixture was filtered and the solvent was removed under reduced pressure yielding a colourless oil (1 g, quant.).
